# Supplementary material for: Validation of ‘lock-and-key’ mechanism of a metal–organic framework in selective sensing of triethylamine
Source: Royal Society of Chemistry journal article supplement (doi:10.1039/c8ra10637a), 2019-01-01
Supplement: c8ra10637a1.pdf [file c8ra10637a1.pdf]

**Electronic Supporting Information (ESI)**

**Validation of ‘lock-and-key’ mechanism of metal-organic framework in selective sensing of triethylamine**

Kowsalya Vellingiri<sup>1</sup>, DanilW. Boukhvalov<sup>2,3</sup>, Ki-Hyun Kim<sup>4</sup>, Ligy Philip<sup>1\*</sup>,

<sup>1</sup>Environmental and Water Resources Engineering Division, Department of Civil Engineering, IIT Madras, Chennai 600 036, India, <sup>2</sup>College of Science, Institute of Materials Physics and Chemistry, Nanjing Forestry University, Nanjing 210037, P. R. China, <sup>3</sup>Theoretical Physics and Applied Mathematics Department, Ural Federal University, Mira Street 19, 620002 Yekaterinburg, Russia, <sup>4</sup>Department of Civil and Environmental Engineering, Hanyang University, 222 Wangsimni-Ro, Seoul 04763, Korea,

- Corresponding Author, E-mail: ligy@iitm.ac.in

## 24 1. Methods and materials

### 25 1.1 Chemicals and synthesis of Al-MOF

26 Aluminium chloride hexahydrate ( $\text{AlCl}_3 \cdot 6\text{H}_2\text{O}$ ), 2-aminoterephthalic acid ( $\text{BDC-NH}_2$ ),  
27  $\text{N,N'$ -Dimethyl formamide (DMF), and triethylamine (TEA) with high purity (>98%) were  
28 purchased from Sigma Aldrich. All other chemicals such as ethylamine (EA), diethylamine  
29 (DEA), toluene (T), ammonia ( $\text{NH}_3$ ), pyridine (Py), formaldehyde (FA), ethyl benzene (EB),  
30 acetone (Ac), and acetaldehyde (AcA) were purchased from commercial suppliers with high  
31 purity and directly used for the analysis without any further purification.

32 Briefly 1.1 g of  $\text{BDC-NH}_2$  was added into 240 mL of DMF in a 250 mL of Erlenmeyer  
33 flask. With the help of rubber stand, flask was held into the 1 L beaker containing 500 mL of  
34 water. The whole content was placed on the hot plate aided with the magnetic stirrer and the  
35 temperature was gradually raised to  $\sim 100^\circ\text{C}$ . Once temperature reached, the  $\text{BDC-NH}_2$  was  
36 allowed to dissolve into the DMF at 550 rpm. After this, 2.996 g of  $\text{AlCl}_3 \cdot 6\text{H}_2\text{O}$  was slowly  
37 added within 2-3 minutes. Once all weighed  $\text{AlCl}_3 \cdot 6\text{H}_2\text{O}$  was added, the content was stirred  
38 at  $\sim 110^\circ\text{C}$  for 3 h. After stirring, the content was kept in a conventional oven for 18 h. The  
39 resulting content was cooled down and centrifuged to obtain yellow solid. The final solid  
40 precipitates were washed (100 mL of DMF  $\times$  3 times), filtered (0.45  $\mu\text{m}$  Whatmann filter  
41 paper), and immersed in ethanol for solvent exchange (50 mL  $\times$  2 days). Finally, Al-MOF  
42 was dried at  $200^\circ\text{C}$  for 12 h using conventional oven and the resulting MOF was stored in 20  
43 mL amber bottles at ambient conditions.

44

### 45 1.2. Instruments for characterization

46 Crystalline property of the synthesized Al-MOF was investigated using D-8 Discover  
47 powder X-ray diffractometer (PXRD) (Bruker, Billerica, Massachusetts). The crystal data  
48 were collected with the angular  $2\theta$  range, scan speed, and step size of  $2-20^\circ$ , 0.1, and 1 sec  
49  $\text{step}^{-1}$ , respectively. FTIR with attenuated total reflectance (ATR) mode was performed using  
50 Perkin Elmer FTIR-100 spectrometer (Akron, Ohio, USA). Raman spectrum of the MOF was  
51 acquired using BRUKER RFS 27- Stand-alone FT-Raman spectrometer (Billerica,  
52 Massachusetts, USA). The morphology was characterized using a Quanta 400 SEM (FEI,  
53 Hillsboro, Oregon). Surface area, pore volume, and pore size was analysed using  
54 Micrometrics ASAP 2010 (Norcross, USA) at liquid nitrogen temperature. Before  $\text{N}_2$   
55 adsorption-desorption measurement, the sample was degassed at  $150^\circ\text{C}$  for 3 h. TGA

analysis was carried out using SDT Q600 with temperature ranging from 40-800 °C in the presence of nitrogen atmosphere. The fluorescent measurement was carried out using Molecular Devices-Spectra Max M3 (Sunnyvale, California, USA).

59

### 1.3. Preparation of standards and probe solution

20 mM of working standard (WS) of TEA was prepared by mixing 3 mL of 98% TEA in 1 L of deionised water (DIW) using amber standard flask. The content was then stored in the refrigerator at 4 °C. For all experiments the sequential dilution of TEA was made from the high concentration of WS. Before the preparation of probe solution, the MOF was activated at 200 °C for 3 h. Then 0.5 g of Al-MOF was dissolved in 500 mL (probe concentration: 1 g L<sup>-1</sup>) of DIW and the content was ultrasonicated for 5 minutes at the amplitude of 50%. The resulted content was stored at 4 °C and before every use the probe was sonicated in a similar manner.

69

### 1.4. Day-to-day stability of Al-MOF

Stability is an important phenomenon which restricts the practical application of MOFs in real filed. In order to improve the aqueous, thermal, and mechanical stability of the MOFs various pre- and post-synthetic approaches was performed. For instance, among those methods, the addition of Lewis basic functional groups (e.g., -NH<sub>2</sub>),<sup>1</sup> ester groups,<sup>2</sup> and water repellent functional groups (e.g., trifluoromethoxy)<sup>3</sup> to the ligand portion of the MOF was found to be an effective option to consider. Similarly, the open metal sites and metal clusters present in the MOF was also found to be responsible for the aqueous stability of MOF (e.g., MIL-101 and MIL-53 frameworks).<sup>4</sup> It can be noted that the selected MOF in this study possess both functional properties such as -NH<sub>2</sub> group as well as stable metal clusters (Al<sup>3+</sup>) responsible for aqueous stability of MOF. By keeping this as a key point, water stability of proposed probe was investigated on daily basis. Prior to fluorescence measurement, each day MOF probe solution was taken from the refrigerator and allowed to reach RT. After that, 3 mL of suspension was sonicated for 5 minutes and immediately subjected to fluorescent analysis.

85

## 86 **1.5. Effect of temperature**

87 The sensitivity of the probe against TEA was checked across eight different temperatures  
88 (RT, 30, 35, 40, 45, 50, 55, and 60 °C). For this measurement, 2 mL of probe solution  
89 (concentration: 1 g L<sup>-1</sup>) was heated at specific condition with the help of instrument and  
90 corresponding fluorescent efficiency was monitored. Similarly, the effect of fluorescence  
91 intensity with respect to Al-MOF was noticed by adding 0.49 mM of TEA (final  
92 concentration) into the probe at specific temperature. In order to visually detect the changes  
93 in fluorescence of proposed probe, TEA concentration was fixed little higher (e.g., 0.49 mM).

94

## 95 **1.6. Selectivity of Al-MOF**

96 In an analytical point of view, it is important to ensure the selective response of the  
97 proposed sensor against TEA in the presence of potential interferences. In this respect, the  
98 sensing behaviour of Al-MOF against a variety of low molecular weight organic  
99 contaminants (such as AcA, Ac, EB, FA, Py, NH<sub>3</sub>, and T) was investigated in both single and  
100 mixed pollutant levels. For this measurement each time a known concentration of selected  
101 pollutants (final concentration: 0.49 mM) were added into the cuvette containing 2 mL of  
102 fresh probe solution and change in fluorescence efficiency of probe was monitored. In the  
103 mixed pollutant case, the final concentration of sum of all pollutants was kept as 0.49 mM  
104 and the experiments were conducted similar with above mentioned method.

105

## 106 **1.7. Density functional theory (DFT) calculations**

107 This calculation was implemented by means of the pseudopotential code SIESTA.<sup>5</sup> More  
108 information please refer to our previous works about MOFs for adsorption of VOCs.<sup>6</sup> All  
109 calculations were performed using the generalized gradient approximation (GGA-PBE)  
110 including spin polarization<sup>7</sup> with taking into account of van der Waals correction.<sup>8</sup> Full  
111 optimization of atomic positions were also carried out. During this optimization, the ion cores  
112 were described by norm-conserving non-relativistic pseudopotentials<sup>9</sup> with cut off radii of  
113 1.14, 1.48, 1.47, 2.06 and 1.25 a.u. for C, N, O, Al, and H, respectively; the wave functions  
114 were expanded with a double- $\zeta$  plus polarization basis of localized orbitals for non-hydrogen

atoms and with a double- $\zeta$  basis for H. Optimizations of the force and total energy were performed with the accuracies of 0.04 eV/Å and 1 meV, respectively.

Bulk structure of Al-MOF contains more than one thousand atoms per unit cell.<sup>10</sup> DFT calculation for these bulk structures is not possible. Therefore, a part of the unit cell that reproduces all feature of local environment near Al-O centers was selected and the sensing mechanism was assessed. Accordingly, the stability of atomic structure of Al-MOF was verified through optimization of atomic structure model. FTIR results clearly showed that there were no direct interactions between TEA and amine groups (Fig. S9). From the literature survey it was found that the main mechanism of MOFs with guest molecules occurs between  $\pi$ -orbitals of aromatic rings of ligands and functional group of the guest molecules. Additionally, so far there are no theoretical calculation methods available for evaluating the contribution of amine groups in fluorescent sensing.<sup>11</sup> Therefore, based on our previous experience<sup>6</sup> and the results obtained from FTIR analysis the amine groups were excluded from the modeling studies.<sup>10</sup>

Adsorption enthalpies were calculated by the standard formula,

$$\Delta H(air) = [E_{host+mol} + (E_{host} + E_{mol})].$$

where  $E_{host}$  and  $E_{mol}$  is the total energies of MOF and single molecules of selected species (in empty box), respectively. Note that this formula describes the adsorption of molecule from the air. However, in the present experimental setup, water was used as the diluent. Therefore, we have evaluated the energies of interactions of MOF with water. In this case the building of the exact model was found difficult task. Thus for evaluation of the energetics of interaction of molecule with water ( $E_{water}$ ), the estimated enthalpy of interaction with water for each group of molecules were summarised. For hydrophilic groups, the estimated energy of interaction with water was about 9.6 kJ mol<sup>-1</sup> (see discussions in Boukhvalov *et al.*<sup>12</sup>) it was about 1.9 kJ mol<sup>-1</sup> for hydrophobic group.<sup>13</sup> From this, the enthalpy of adsorption was calculated as follows,

$$\Delta H(water) = \Delta H(air) - E_{water}$$

These calculations were performed for the zero temperature case. By taking account of temperature we have also evaluated Gibbs free energy of the system,

$$\Delta G = \Delta H + T\Delta S$$

145 where T is the temperature and  $\Delta S$  is the change of entropy of adsorbed molecule and which  
146 has been estimated by considering the standard gas→ liquid transition,

$$\Delta S = \frac{\Delta H_{\text{vaporisation}}}{T}$$

148 where  $\Delta H_{\text{vaporization}}$  is the measured enthalpy of vaporization.

149

## 150 **1.8. Reusability test**

151 Initially, the prepared probe solution (1 g L<sup>-1</sup>) was used to sense 0.49 mM of TEA  
152 molecules. Later, the MOF was centrifuged at 7000 rpm for 5 minutes to separate the solid  
153 portion using filtration. The collected MOF was washed with ethanol:water (1:1 ratio). The  
154 MOF powder was centrifuged from the slurry and dried in an oven at 150 °C for 2 h. This  
155 recycled MOF was dispersed in water. Later, the fluorescence efficiency of this washed MOF  
156 (blank-2) was noted. Change in fluorescence intensity of this recycled probe was monitored  
157 (cycle 2) after introducing TEA (0.49 mM) into the probe solution. Similarly, the process was  
158 repeated for other cycles.

159

## 160 **2. Results and discussion**

### 161 **2.1. Fluorescent property of Al-MOF: Results of DFT calculation part**

162 The interaction energetics of water molecules on Al<sup>3+</sup> sites was initially performed. In  
163 light of this simulation, the enthalpy of adsorption for water molecules from the air was  
164 calculated as -232 kJ mol<sup>-1</sup>. Furthermore, the Gibbs free energy of MOF at RT was calculated  
165 by taking into account of adsorption from water and the value was -157 kJ mol<sup>-1</sup>. The  
166 magnitude of calculated value was approximately five times larger than the value of total  
167 energy of hydrogen bonds per molecule in an aqueous phase (-43.98 kJ mol<sup>-1</sup>).<sup>9, 12</sup> Therefore,  
168 formation of the Al-water bonds was much more preferable for water molecules that were  
169 present in the aqueous phase. In addition, this high stability of Al-MOF was also attributed  
170 by the formation of robust coordination bond between water and open metal sites of Al<sup>3+</sup>.<sup>6</sup>

171

### 172 **2.2. Storability of Al-MOF**

173 Although MOFs have diverse structural superiority (e.g., specific internal and external  
174 surface area, wider cages/pores) still the synthesis of this material needs longer reaction time.  
175 Accordingly, it would be helpful to study the storage stability of this material under ambient  
176 condition. In this regard, 100 mg of synthesized MOF was kept on the laboratory table over a  
177 month and at every 15 days of interval, MOF probe solution (without thermal activation) was  
178 prepared and their fluorescent efficiency was tested spectrometrically. Fig.S4b-d shows the  
179 result of storage stability of Al-MOF over a period of 30 days. Accordingly, there was only  
180 minor enhancement in fluorescent intensity after storage of 30 days at ambient condition  
181 (e.g., RFU for 0 and 30 day: 238 and 280 a.u.) (Fig. S4b). This slight increase in the  
182 fluorescence intensity of MOF over a period of time was attributed to the possible hydrolysis  
183 of  $\text{Al}^{3+}$  centres by water molecules (formation of stable Al-water bond). Theoretically,  
184 hydrolysis of  $\text{Al}^{3+}$  centres restricts the free rotation of aromatic rings of the MOF.<sup>14</sup> This  
185 process encourages the charge transfer between n electron of  $-\text{NH}_2$  group and the  $\pi$  electron  
186 of the MOF. In this way, the fluorescence intensity of the MOF was increased.

187 Likewise, the results of FTIR and PXRD analysis also confirmed the structural integrity of  
188 Al-MOF in water over a period of 30 days (Fig.S4c and d). Here it is noteworthy that the  
189 peak responsible for in and out phase stretching of  $-\text{NH}_2$  was observed at 3385 and 3496  $\text{cm}^{-1}$ ,  
190 respectively. Nonetheless, the intensity of these peaks was considerably reduced in water  
191 dispersed phase of Al-MOF. This decrease was not visually seen in the FTIR spectrum of  
192 synthesized and stored form of Al-MOF (Fig. S4c). The reason for this reduction may be the  
193 possible hydrolysis of inorganic binding units (i.e.,  $\text{Al}^{3+}$ ).<sup>15</sup> This process of hydrolysis tends  
194 to diminish the connectivity between the linker units and metal ions.<sup>16</sup> Nonetheless, the DFT  
195 calculation confirmed that the hydrolysis of  $\text{Al}^{3+}$  centres did not affect the aqueous stability  
196 of the framework (Refer to DFT calculation results of this section).

197

### 198 **2.3. Sensitivity profiles of a month stored Al-MOF**

199 In general, the structural stability of the prepared MOF could be easily destroyed by the  
200 omnipresent factors such as moisture, pressure, and temperature. In order to extend the  
201 applicability of the MOF to an industrial scale one should ensure the storability profile of  
202 MOF at ambient conditions. Thus, the sensing efficiency of a month stored MOF against  
203 diverse concentrations of TEA was also investigated (Fig.S5). Interestingly, the MOF stored  
204 over a month at ambient condition showed almost similar performance with the freshly

synthesized MOF (Fig.S5a). This result indicated that the physical and chemical properties of the Al-MOF were not affected by atmospheric moisture and pressure.

Al-MOF has a tendency to react with omnipresent molecules (e.g., water, CO<sub>2</sub>, and FA) which could affect the fluorescence property of this material.<sup>6</sup> These adsorbed omnipresent molecules could compete with the ligand units of MOF. This process disturbs the actual electronic transition of MOF.<sup>17</sup> Therefore, this change in fluorescence behaviour of MOF as a function of storage time can be verified through the fluorescence calibration analysis. In this context, the linear calibration of stored MOF towards diverse concentration of TEA at three different storage intervals namely 0, 15, and 30 days was also carried out (Fig.S5b). The obtained slope (sensitivity) values for the storage time of 0, 15, and 30 days were 3815, 3982, and 3350, respectively. This closer sensitivity value along with good R<sup>2</sup> value ( $\geq 0.99$ ) confirms the fluorescence stability of the sensing probe. This result provides an impression that, one can use the calibration curve of Al-MOF for a month to derive the unknown TEA concentrations in the aqueous solution. Overall, the MOF was not disturbed by any of the omnipresent factors to give an impression that the selected Al-MOF was highly stable in all kinds of fluorescent measurement. In this respect, the proposed method was accurate as well as time efficient for the sensing of TEA in aqueous solution.

#### **2.4. Effect of temperature on sensing behaviour of Al-MOF**

Temperature is an important factor which affects the sensing performance of probe material. In this regard, it is essential to study the behaviour of proposed probe at various temperatures. Results showed that there was no significant change in fluorescence intensity with respect to increase in temperature. For instance, the RFU value of MOF at RT and 60 °C was 487 and 537 a.u., respectively (Fig.S6a). Although there was no significant increase, the small variation (i.e., higher) in fluorescence intensity was supported by the enhanced dispersion of the probe compared to RT. When temperature increases, the dispersion ability of the MOF appeared to increase because of the fast solubilisation of Al-MOF in water. In other words, at higher temperature physical forces such as van der Waals and hydrogen bonding tend to loosen which results the solubilisation of loosely bound particles in reaction medium (e.g., water).<sup>18</sup> In this regard, the optical density (OD) value increased which in turn slightly increased the intensity of fluorescence. Similarly, the addition of 0.49 mM of TEA into the probe enhanced the RFU of MOF from 487 to 2349 a.u. at RT (Fig.S6b). Likewise,



237 gradual increase in the sensing efficiency of the probe with increase in temperature was also  
238 observed. Particularly the RFU of MOF@0.49 mM at RT and 60°C was 2349 and 2467 a.u.,  
239 respectively. The difference in the RFU value of MOF@0.49 mM at RT and 60°C was about  
240 118 units. This result indicates that there was only slight influence on the sensing ability of  
241 Al-MOF with respect to temperature. Consequently, the sensing of TEA using Al-MOF was  
242 suspected to be accompanied by physical process such as non-covalent bond interactions.<sup>19</sup>  
243 These non-covalent bond interactions might be attributed to the interaction between -CH<sub>3</sub>  
244 portions of the TEA to the  $\pi$ -orbitals of the aromatic rings of the MOF.

## 245 References

- 246
- 247 1 C. Gomes Silva, I. Luz, F. X. Llabrés i Xamena, A. Corma and H. García, *Chem. - Eur. J.*, 2010,
- 248 **16**, 11133-11138.
- 249 2 J. M. Taylor, R. Vaidhyanathan, S. S. Iremonger and G. K. Shimizu, *J. Am. Chem. Soc.*, 2012, **134**,
- 250 14338-14340.
- 251 3 T. Wu, L. Shen, M. Luebbbers, C. Hu, Q. Chen, Z. Ni and R. I. Masel, *Chem. Commun.*, 2010, **46**,
- 252 6120-6122.
- 253 4 K. A. Cychosz and A. J. Matzger, *Langmuir*, 2010, **26**, 17198-17202.
- 254 5 J. M. Soler, E. Artacho, J. D. Gale, A. García, J. Junquera, P. Ordejón and D. Sánchez-Portal, *J.*
- 255 *Phys.: Condens. Matter*, 2002, **14**, 2745.
- 256 6 K. Vellingiri, D. W. Boukhvalov, S. K. Pandey, A. Deep and K.-H. Kim, *Sens. Actuators, B*, 2017,
- 257 **245**, 305-313.
- 258 7 J. P. Perdew, K. Burke and M. Ernzerhof, *Phys. Rev. Lett.*, 1996, **77**, 3865.
- 259 8 G. Román-Pérez and J. M. Soler, *Phys. Rev. Lett.*, 2009, **103**, 096102.
- 260 9 N. Troullier and J. L. Martins, *Phys. Rev. B*, 1991, **43**, 1993.
- 261 10 O. Lebedev, F. Millange, C. Serre, G. Van Tendeloo and G. Férey, *Chem. Mater.*, 2005, **17**, 6525-
- 262 6527.
- 263 11 X.-Y. Xu and B. Yan, *Dalton Trans.*, 2016, **45**, 7078-7084.
- 264 12 D. W. Boukhvalov, D. R. Dreyer, C. W. Bielawski and Y. W. Son, *ChemCatChem*, 2012, **4**, 1844-
- 265 1849.
- 266 13 J. N. Israelachvili, *Intermolecular and surface forces*, Academic press, 2011.
- 267 14 T. Wittmann, R. Siegel, N. Reimer, W. Milius, N. Stock and J. Senker, *Chem. - Eur. J.*, 2015, **21**,
- 268 314-323.
- 269 15 E. Stavitski, M. Goesten, J. Juan-Alcañiz, A. Martinez-Joaristi, P. Serra-Crespo, A. V. Petukhov,
- 270 J. Gascon and F. Kapteijn, *Angew. Chem., Int. Ed.*, 2011, **50**, 9624-9628.
- 271 16 J. J. Low, A. I. Benin, P. Jakubczak, J. F. Abrahamian, S. A. Faheem and R. R. Willis, *J. Am.*
- 272 *Chem. Soc.*, 2009, **131**, 15834-15842.
- 273 17 J. Yang, L. Zhang, X. Wang, R. Wang, F. Dai and D. Sun, *RSC Adv.*, 2015, **5**, 62982-62988.
- 274 18 L. Heinke, Z. Gu and C. Wöll, *Nat. Commun.*, 2014, **5**, 4562.
- 275 19 K. Vellingiri, P. Kumar, A. Deep and K.-H. Kim, *Chem. Eng. J.*, 2017, **307**, 1116-1126.

276

277 **Table S1.** Summary of surface area and pore volume characteristics of Al-MOF

278

| Order | Type of measurement                        | Value                               |
|-------|--------------------------------------------|-------------------------------------|
| 1     | BET surface area                           | 276 m <sup>2</sup> g <sup>-1</sup>  |
| 2     | Langmuir surface area                      | 410 m <sup>2</sup> g <sup>-1</sup>  |
| 3     | t-Plot micropore area                      | 185 m <sup>2</sup> g <sup>-1</sup>  |
| 4     | t-Plot External surface area               | 90.5 m <sup>2</sup> g <sup>-1</sup> |
| 5     | Adsorption average pore diameter<br>(4V/A) | 174 Å                               |
| 6     | Desorption average pore diameter<br>(4V/A) | 126 Å                               |
| 7     | Adsorption average pore width              | 65.9 Å                              |

279

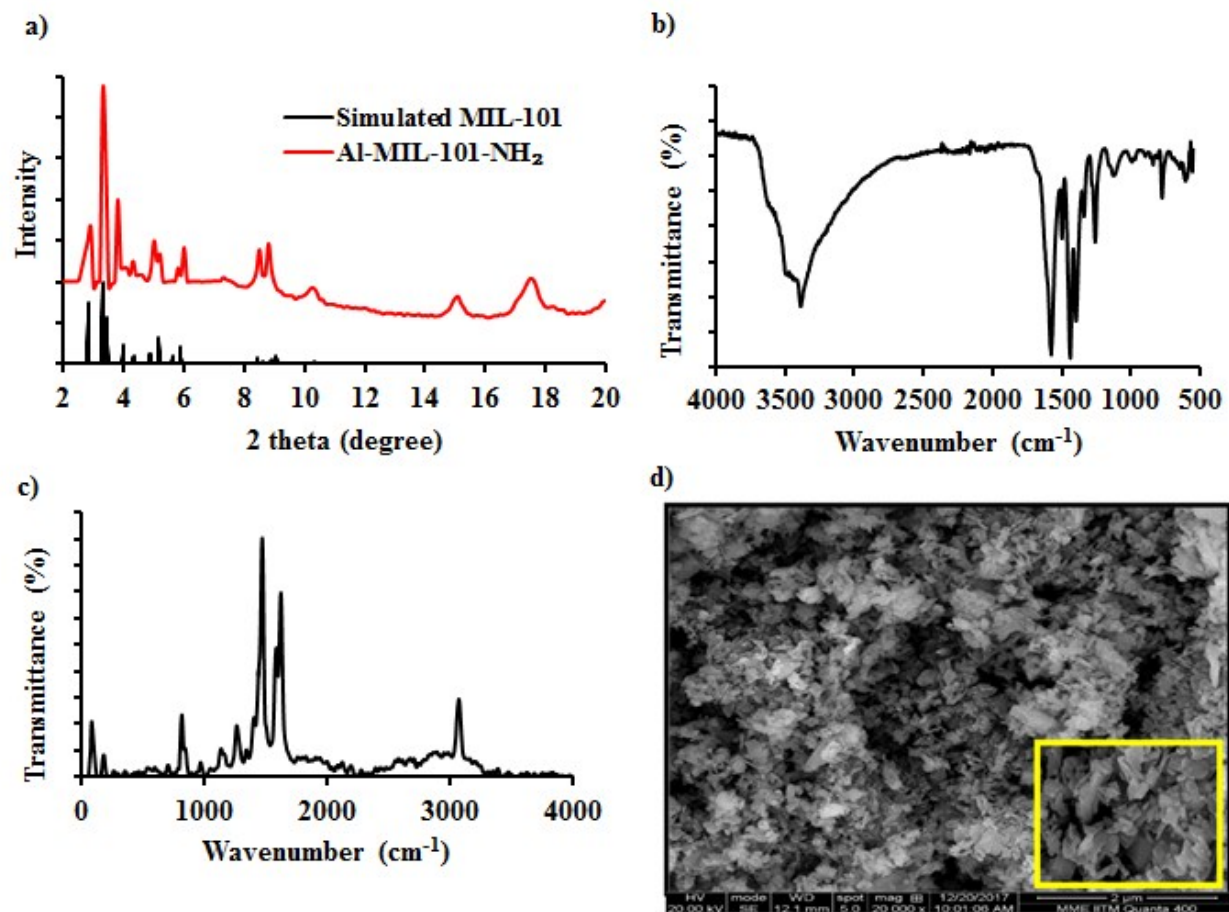

**Fig. S1.** Summary of a) PXRD, b) FTIR, c) Raman spectrums, and d) SEM image of synthesized Al-MOF

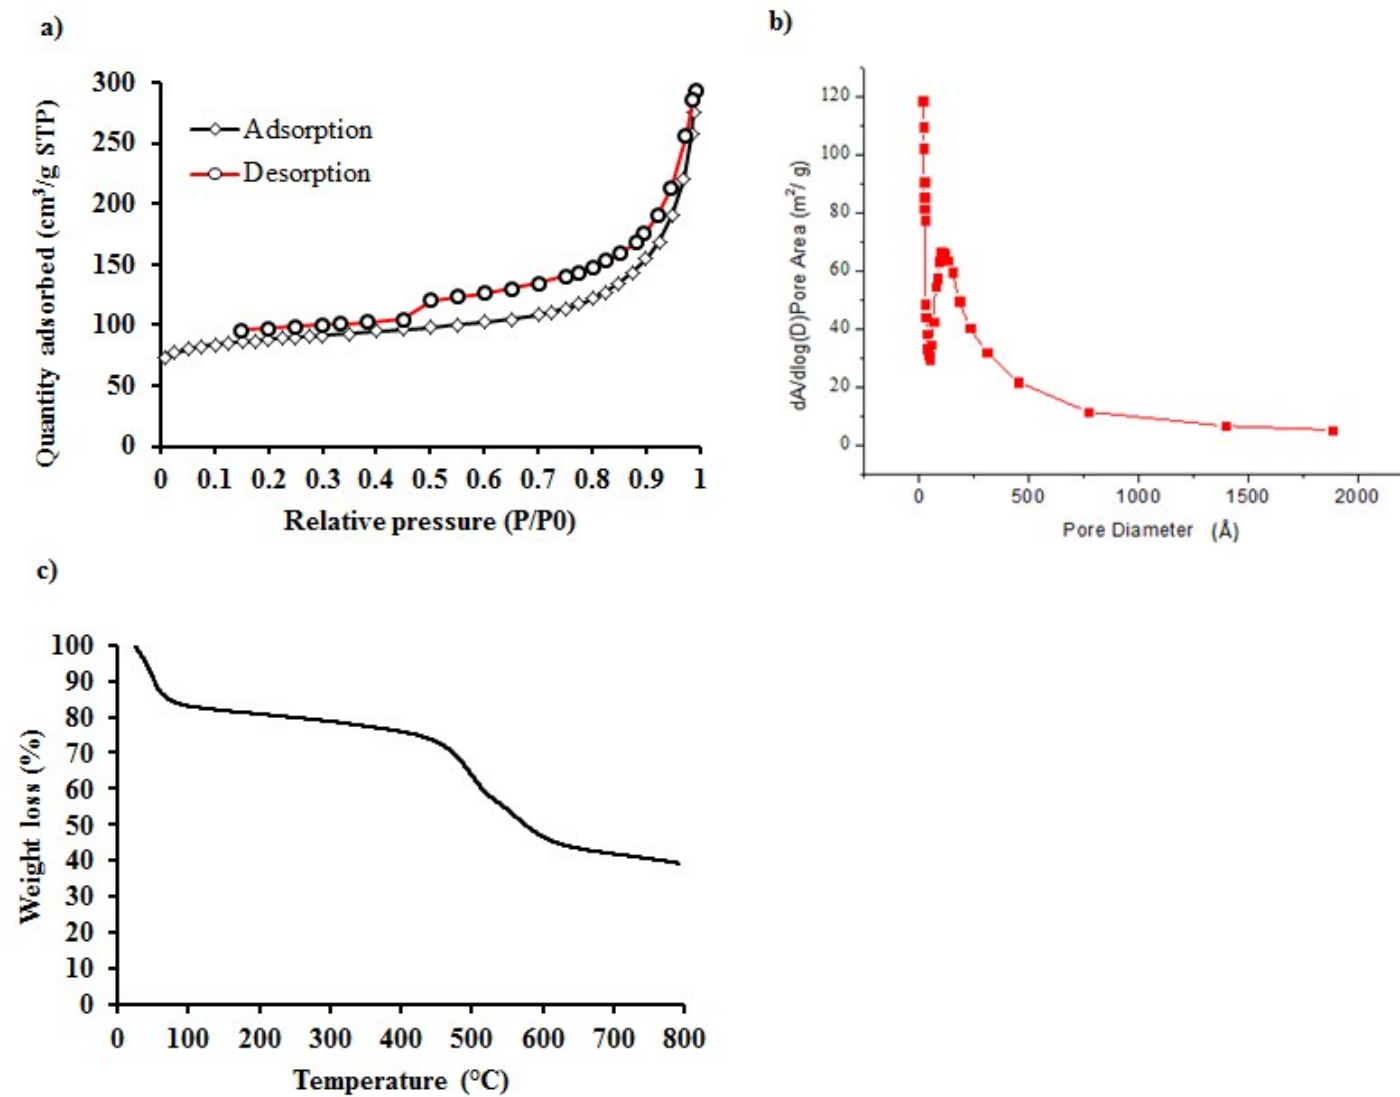

**Fig. S2.**  $N_2$  adsorption-desorption isotherm (a), pore size distribution, and TGA (c) patterns of Al-MOF

a)

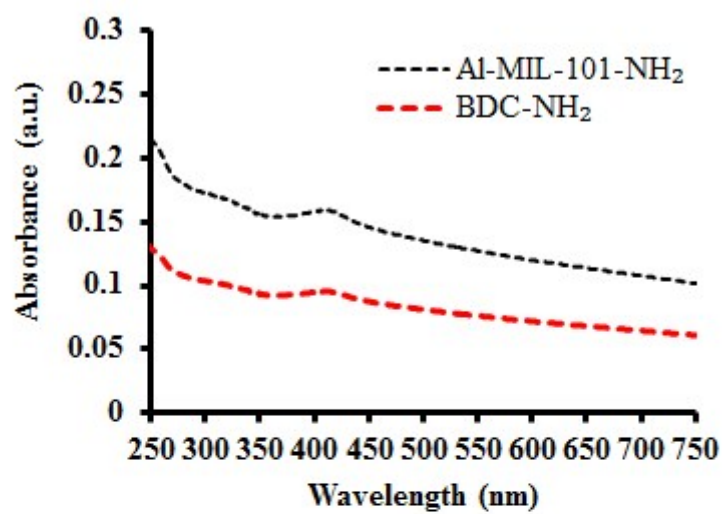

b)

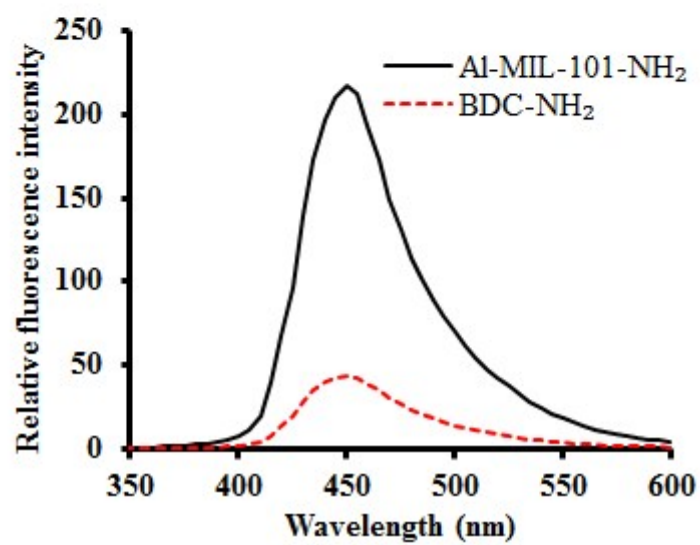

**Fig. S3.** Excitation and emission spectrum of ligand (BDC-NH<sub>2</sub>) and MOF (Al-MOF) in aqueous phase.

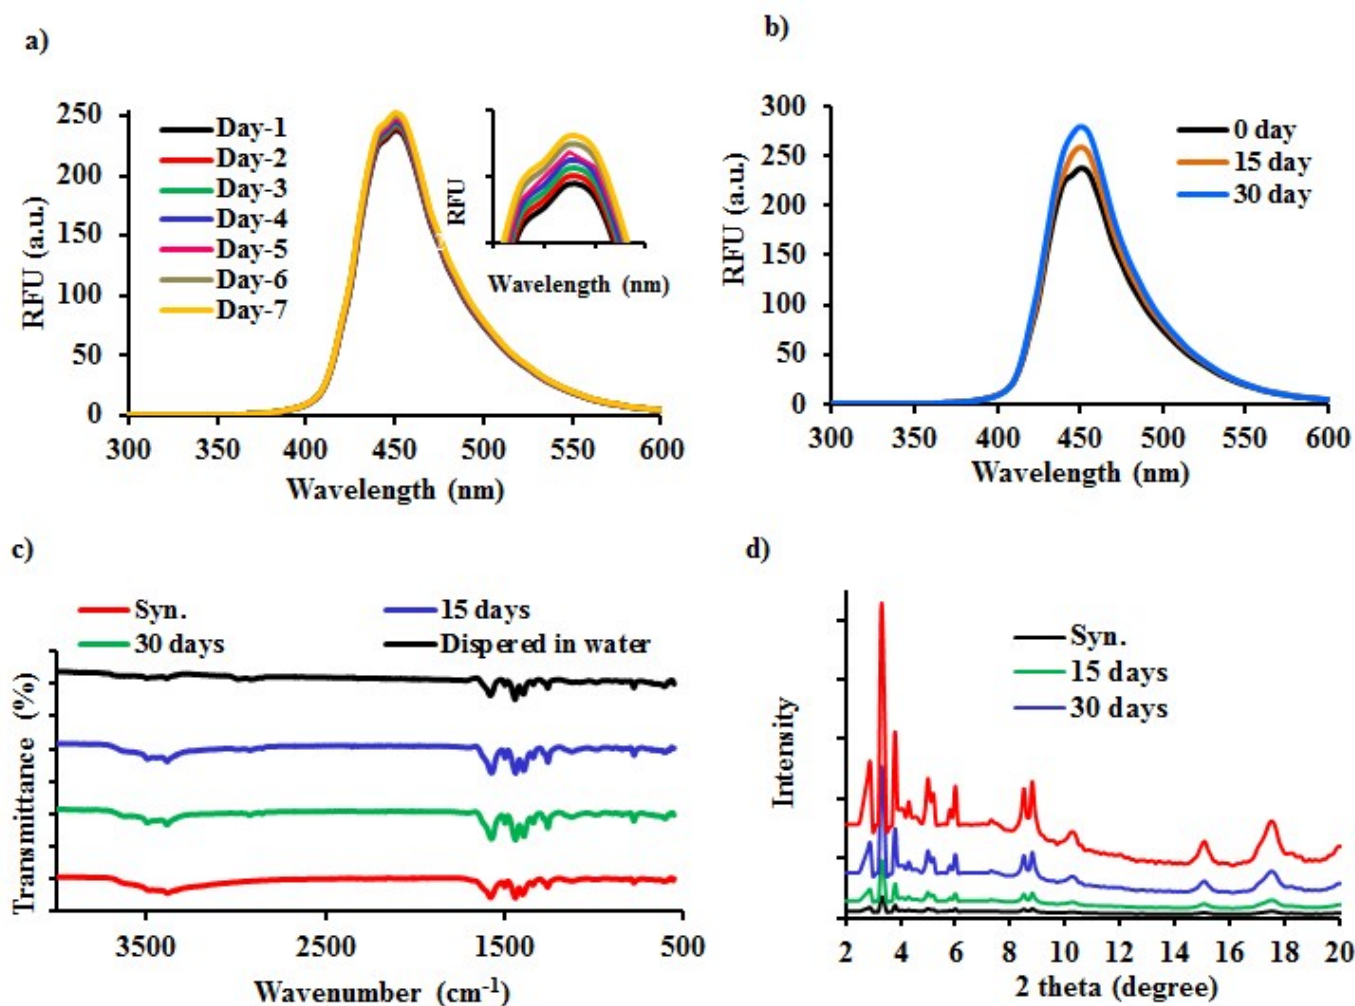

**Fig. S4.** Fluorescent stability of Al-MOF against diverse aqueous and ambient storage conditions. a) Day-to-day stability of Al-MIL-NH<sub>2</sub> dispersed in water b) fluorescent response of a month stored Al-MOF, c) and d) FTIR and PXRD pattern of the MOF probe solution dispersed in water and as well as stored over a month at ambient condition.

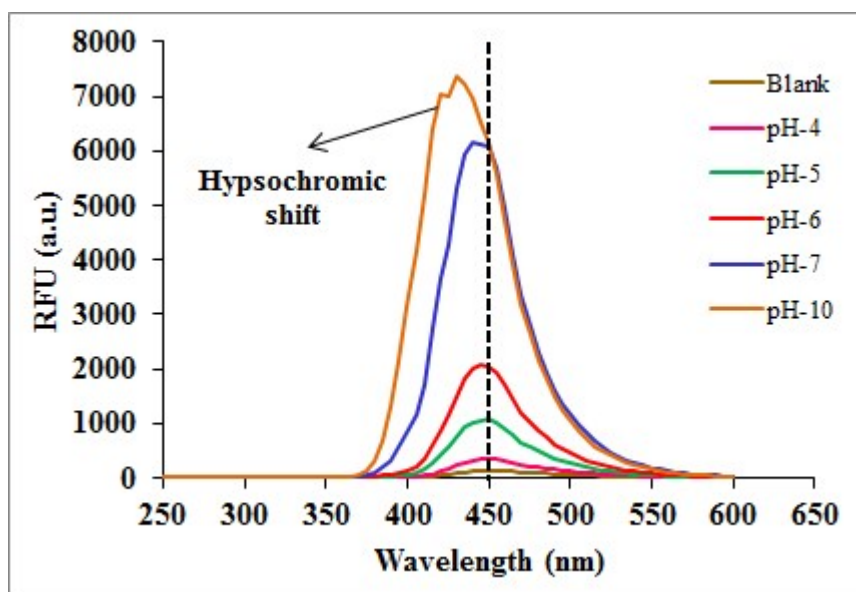

**Figure S5.** Fluorescent behaviour of Al-MOF at different pH.



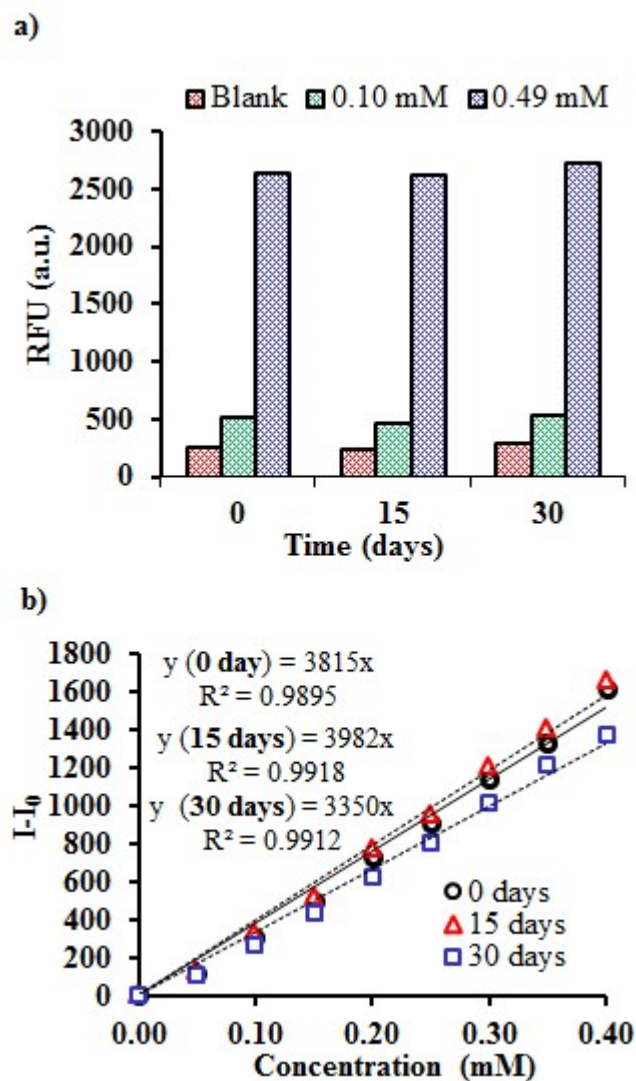

**Fig. S6.** Sensitive response of stored Al-MOF probe against TEA. a) Response of a month stored Al-MOF towards 0.1 and 0.49 mM of TEA concentrations and b) linear calibration curve of Al-MOF stored at different intervals against TEA

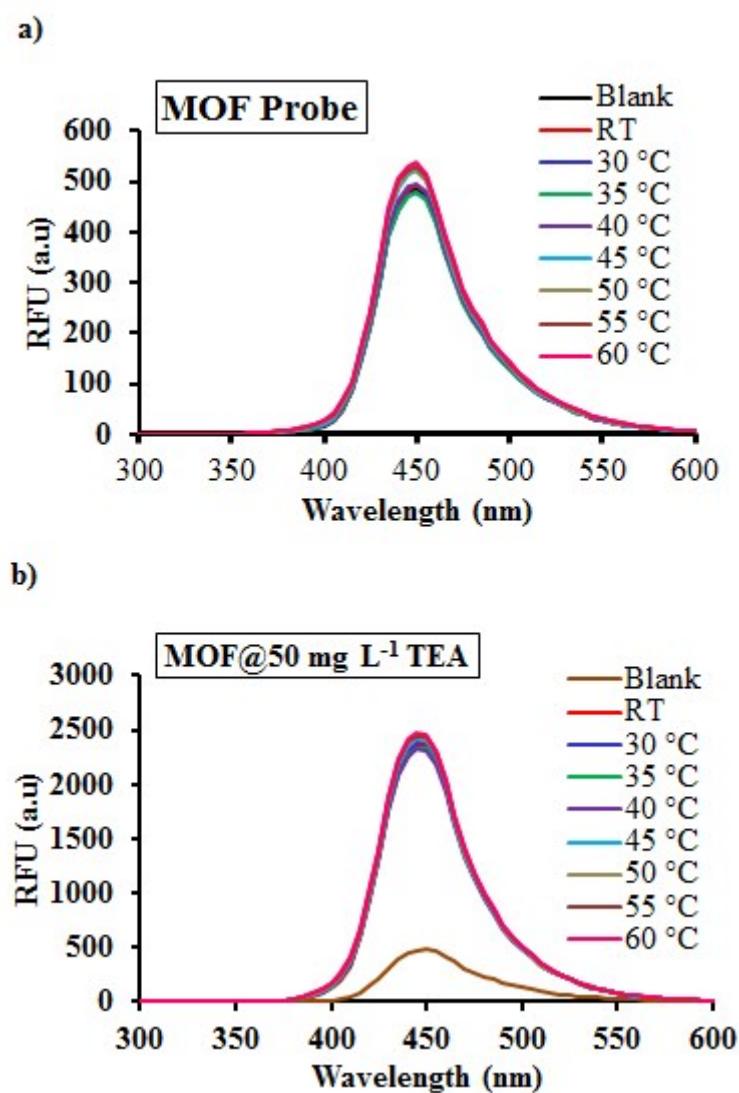

**Fig. S7.** Effect of temperature for the sensing of TEA using Al-MOF as a probe material.

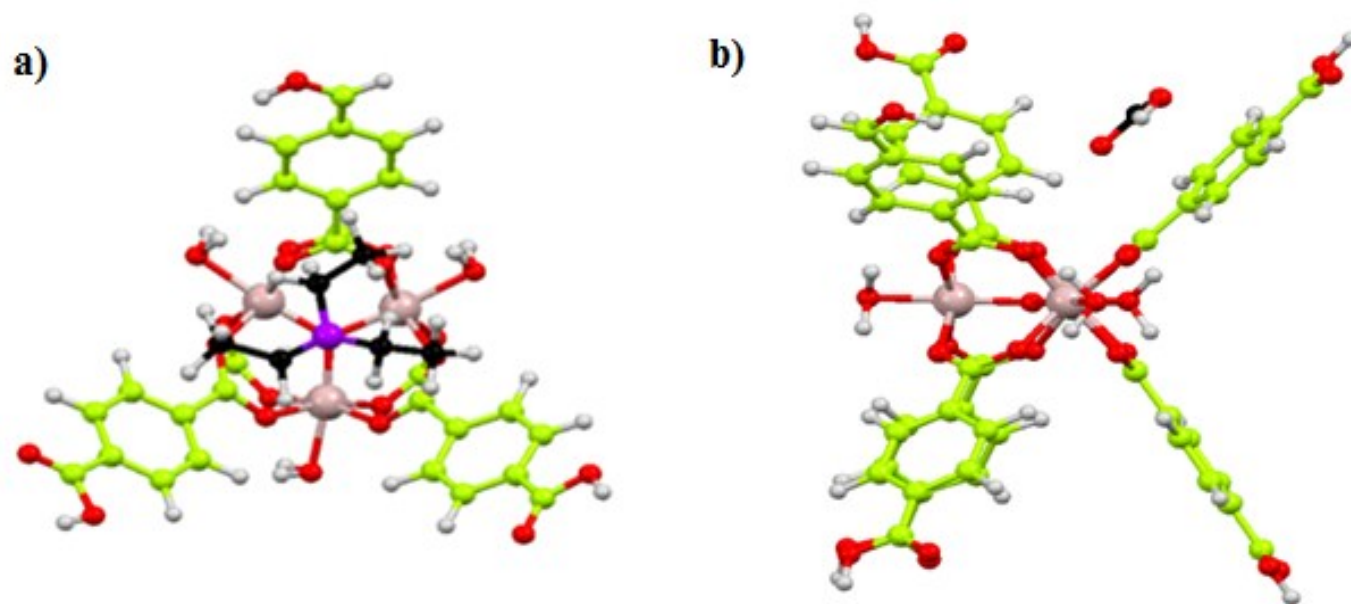

**Fig. S8.** Optimized atomic unit structure of Al-MOF with adsorbed TEA (a) and FA molecules (b). Note: carbon atoms of TEA were highlighted by black colour.

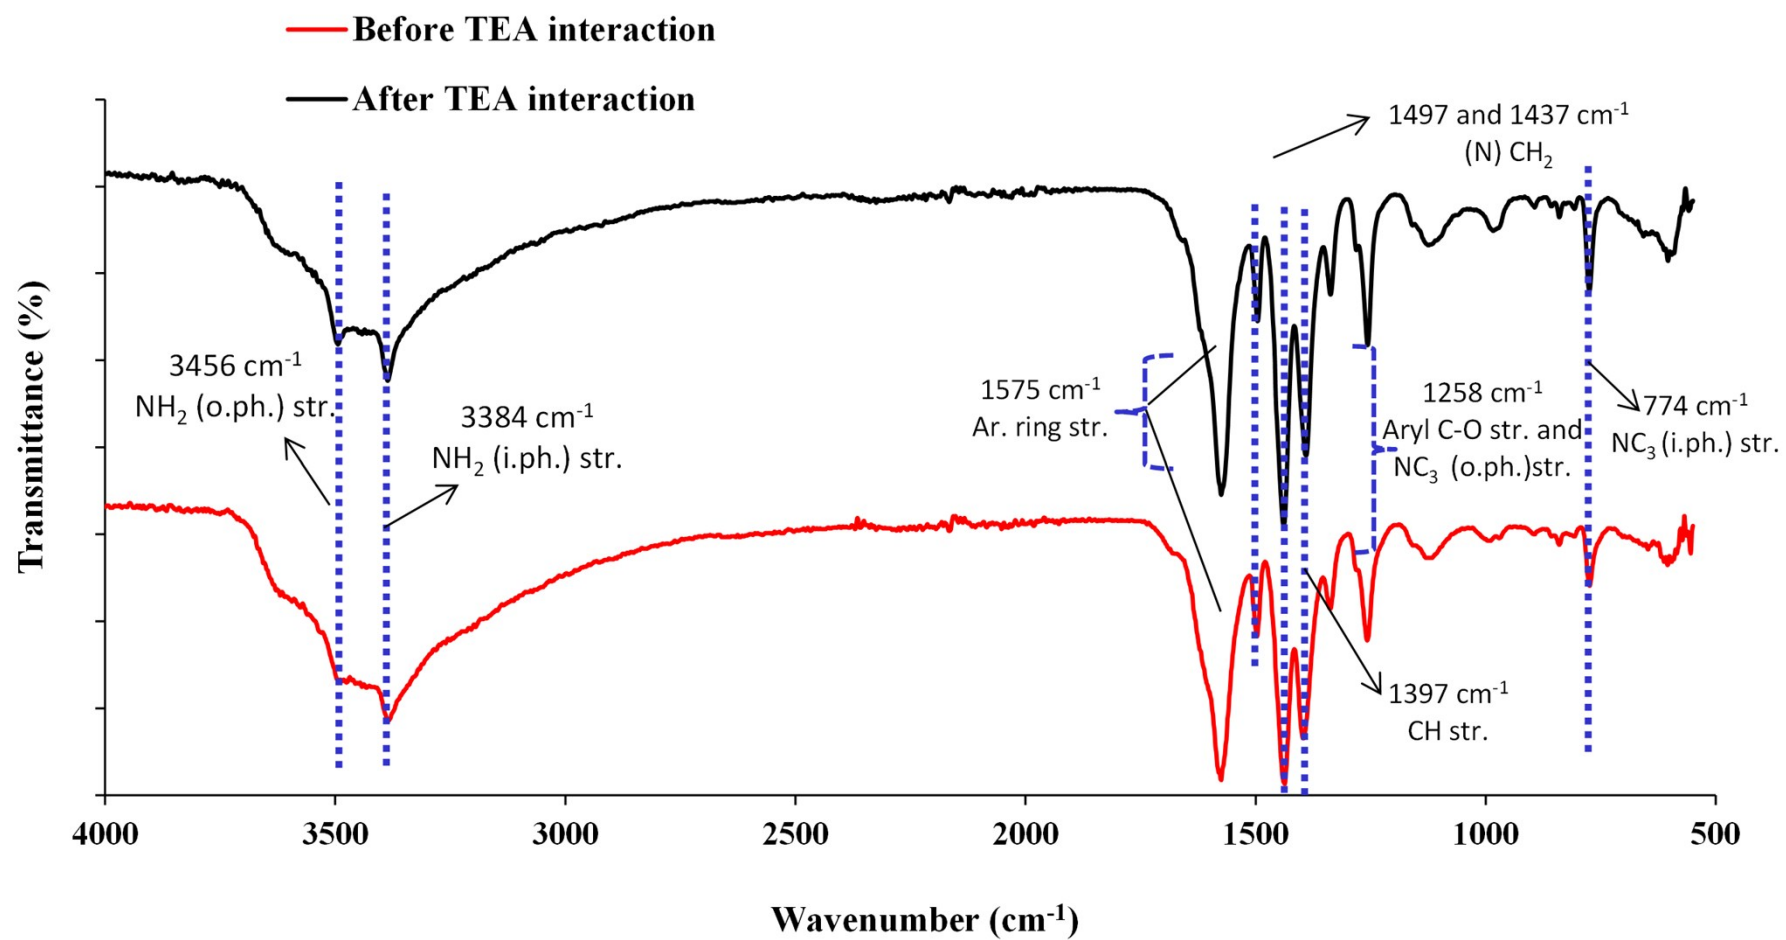

**Fig. S9.** FTIR results of Al-MOF before and after interaction with TEA.

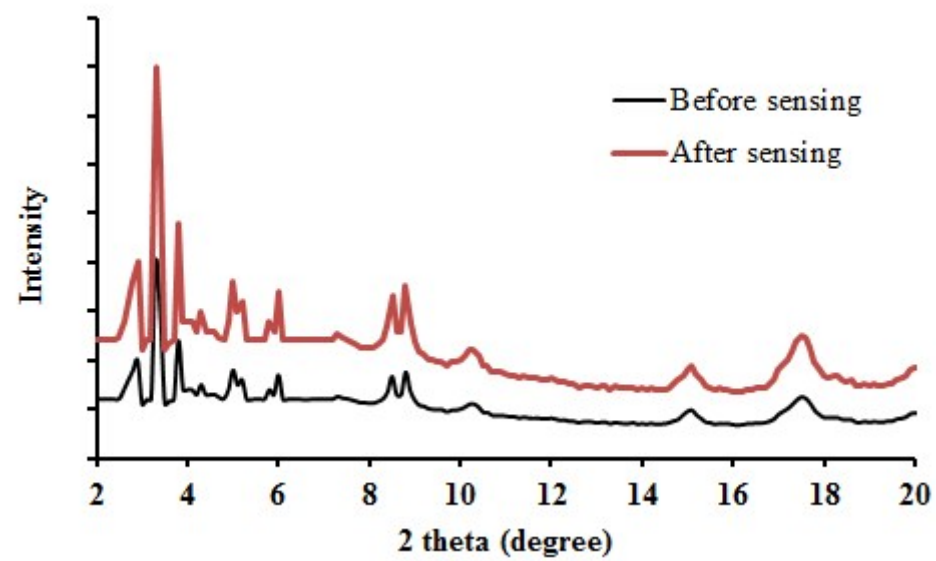

**Fig. S10.** PXRD results of Al-MOF before and after interaction with TEA

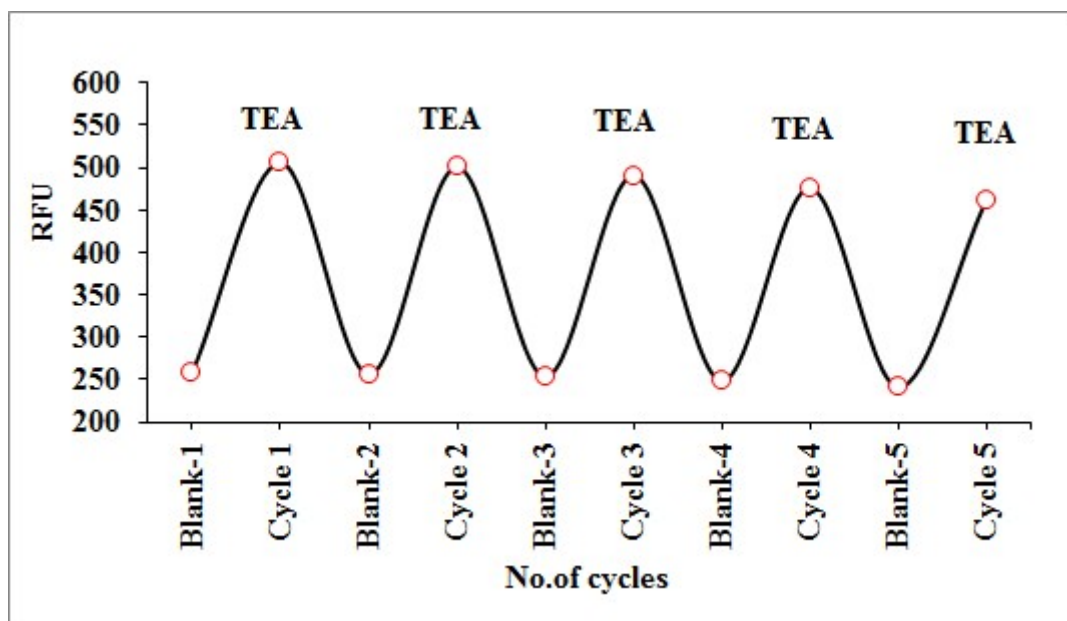

**Fig. S11.** Regeneration profiles of Al-MOF after interaction with TEA. (Concentration of TEA: 0.10 mM, desorbing agents: water and ethanol in 1:1 ratio and thermal treatment (150 °C for 2 h).
